# Supplementary material for: High-rate potassium ion and sodium ion batteries by co-intercalation anodes and open framework cathodes
Source: Royal Society of Chemistry journal article supplement (doi:10.1039/c8nr01685b), 2018-01-01
Supplement: c8nr01685b1.pdf [file c8nr01685b1.pdf]

## **Supplementary Information**

# High-Rate Potassium Ion and Sodium Ion Batteries by Co-Intercalation Anodes and Open Framework Cathodes

*Kathleen Moyer<sup>a</sup>, Jennifer Donohue<sup>a</sup>, Neha Ramanna<sup>a</sup>, Adam P. Cohn<sup>b</sup>, Nitin*

*Muralidharan<sup>a</sup>, Janna Eaves<sup>b</sup>, Cary L. Pint<sup>a, b \*</sup>*

<sup>a</sup>Interdisciplinary Materials Science Program, Vanderbilt University, Nashville, TN  
37235

<sup>b</sup>Department of Mechanical Engineering, Vanderbilt University, Nashville, TN 37235

KEYWORDS: co-intercalation, graphite, prussian blue, open framework cathodes,  
potassium ion batteries, sodium ion batteries, fast charging

\*Corresponding Author: [cary.l.pint@vanderbilt.edu](mailto:cary.l.pint@vanderbilt.edu)

**Figure S1**

**Prussian Blue (Na) Synthesis**

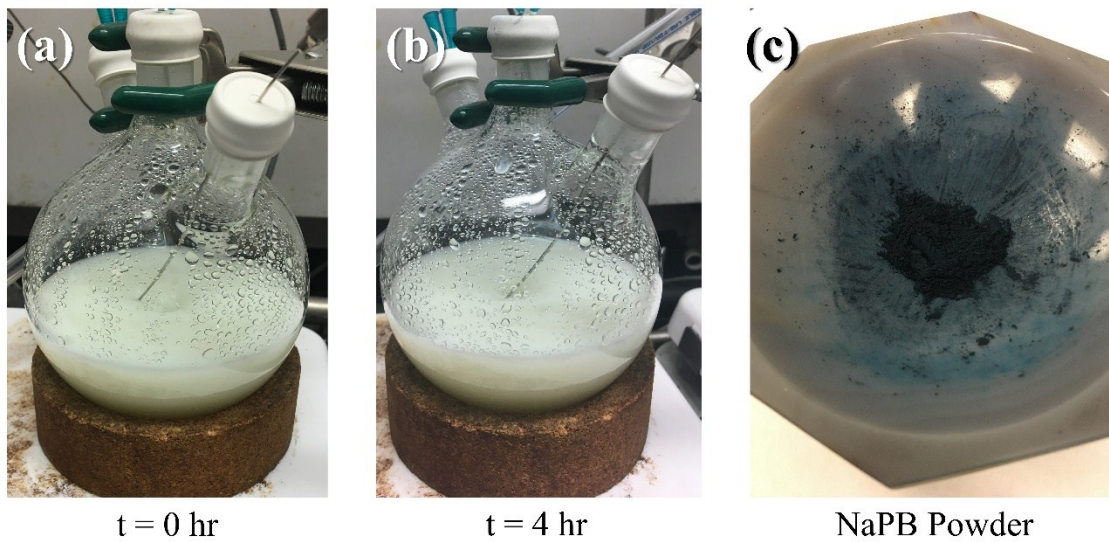

**Figure S1:** Experimental images of NaPB synthesis after all precursors were added at (a)  $t = 0$  hours, (b)  $t = 4$  hours, (c) and the resulting product.

**Figure S2**

**Prussian Blue (K) Synthesis**

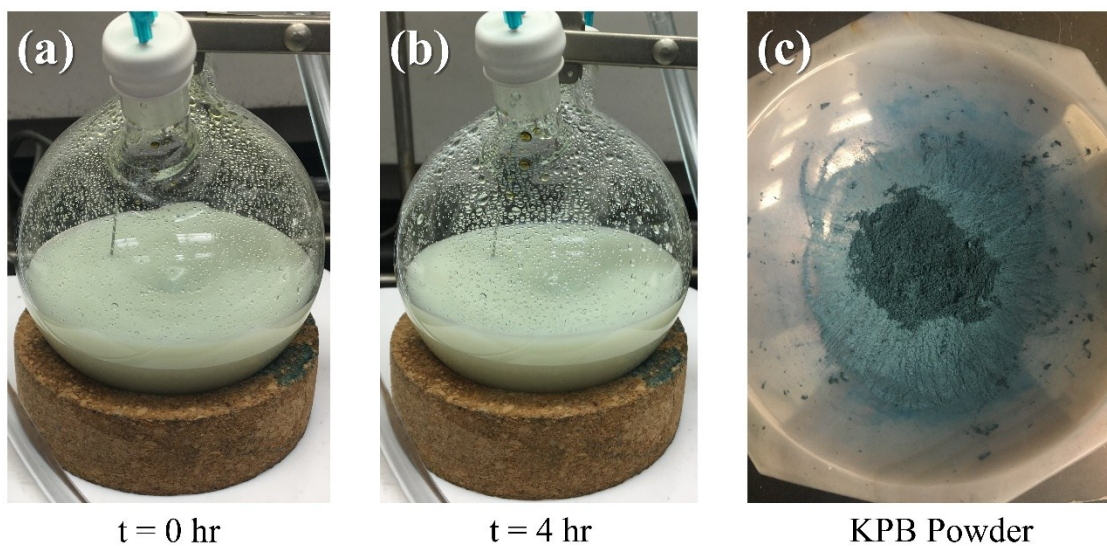

**Figure S2:** Experimental images of KPB synthesis after all precursors were added at (a)  $t = 0$  hours, (b)  $t = 4$  hours, (c) and the resulting product.

**Figure S3**

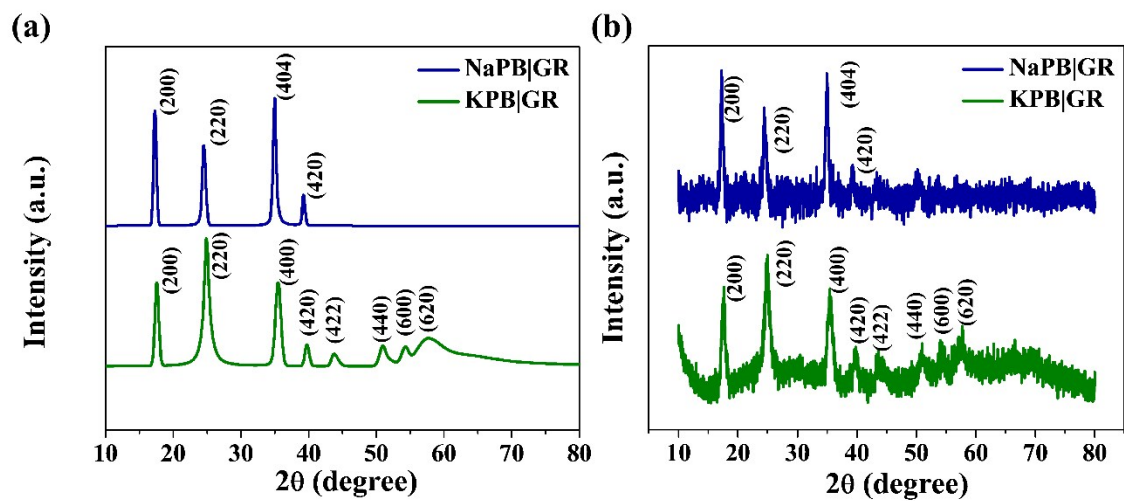

**Figure S3:** XRD of synthesized NaPB and KPB: (a) smoothed and (b) unsmoothed data.

**Figure S4**

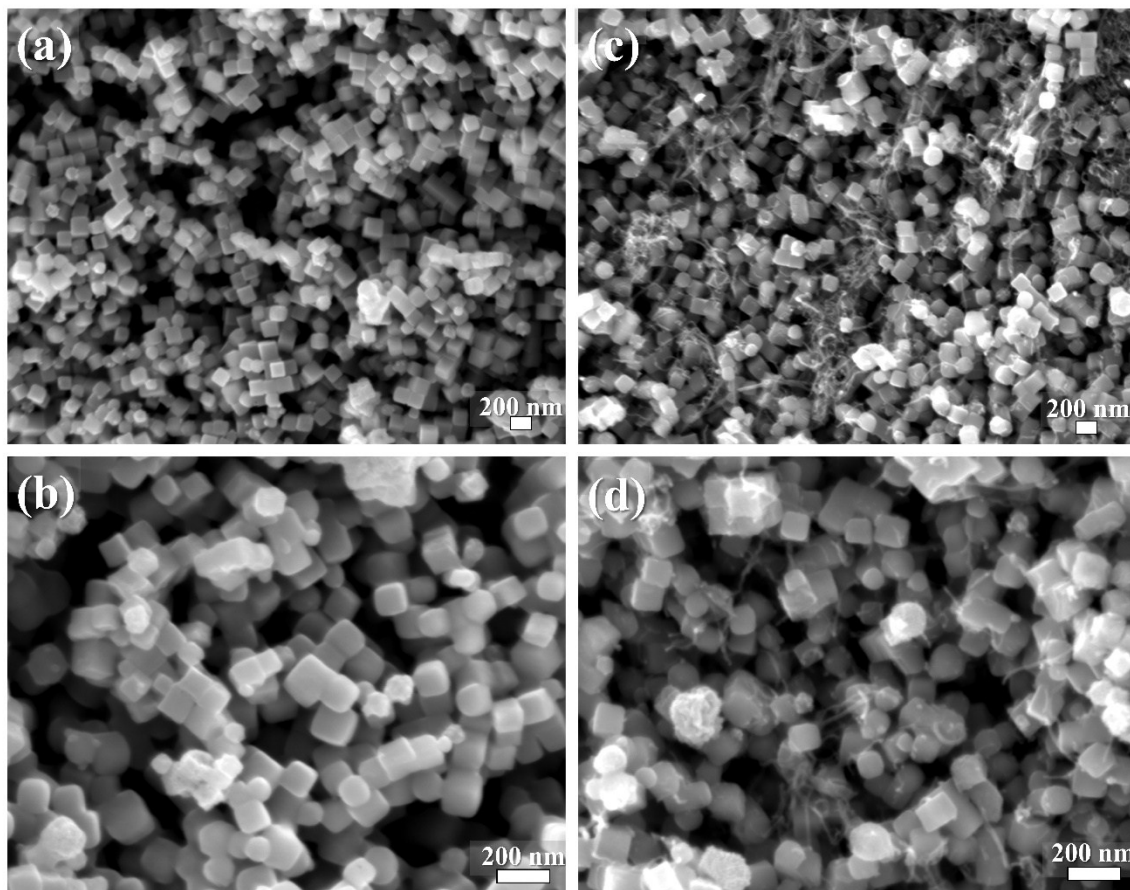

**Figure S4:** Scanning electron microscopy images of (a), (b) synthesized NaPB and (c), (d) synthesized NaPB with multiwall carbon nanotubes.

**Figure S5**

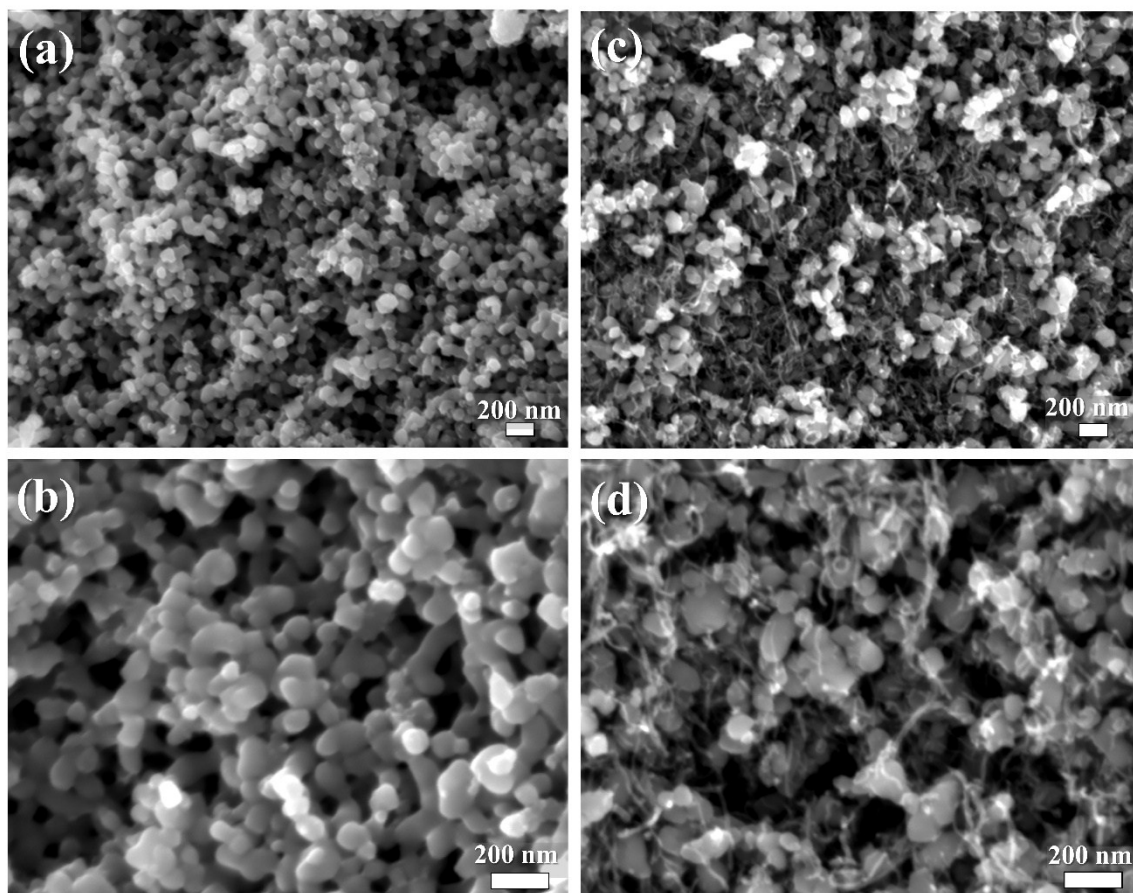

**Figure S5:** Scanning electron microscopy images of (a), (b) synthesized KPB and (c), (d) synthesized KPB with multiwall carbon nanotubes.



**Figure S6**

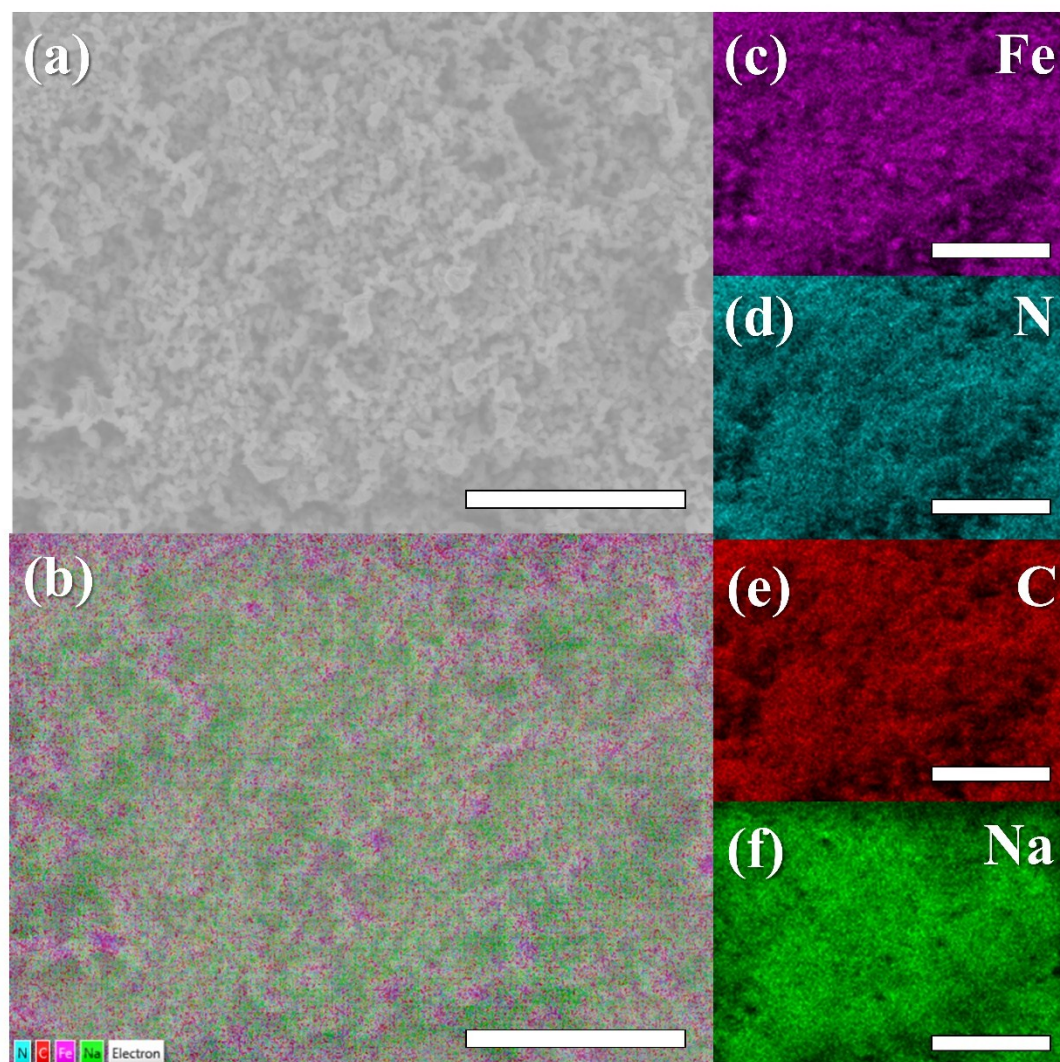

**Figure S6:** Elemental analysis of synthesized NaPB all with scale bat of 5 μm (a) electron image, (b) all elements, (c) iron, (d) nitrogen, (e) carbon, (f) sodium.

**Figure S7**

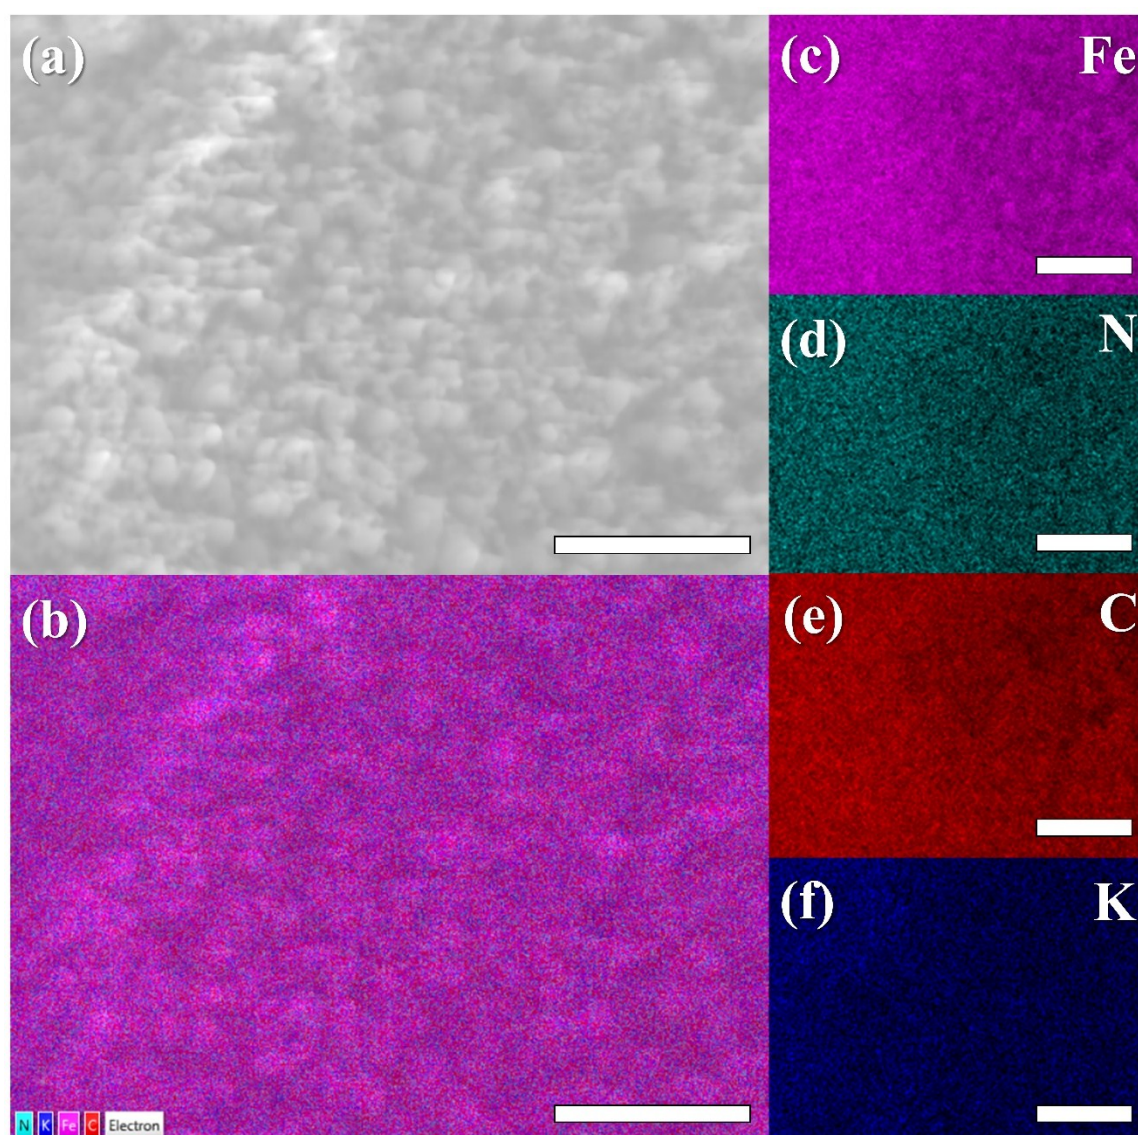

**Figure S7:** Elemental analysis of synthesized KPB all with scale bat of 1  $\mu\text{m}$  (a) electron image, (b) all elements, (c) iron, (d) nitrogen, (e) carbon, (f) potassium.



**Figure S8**

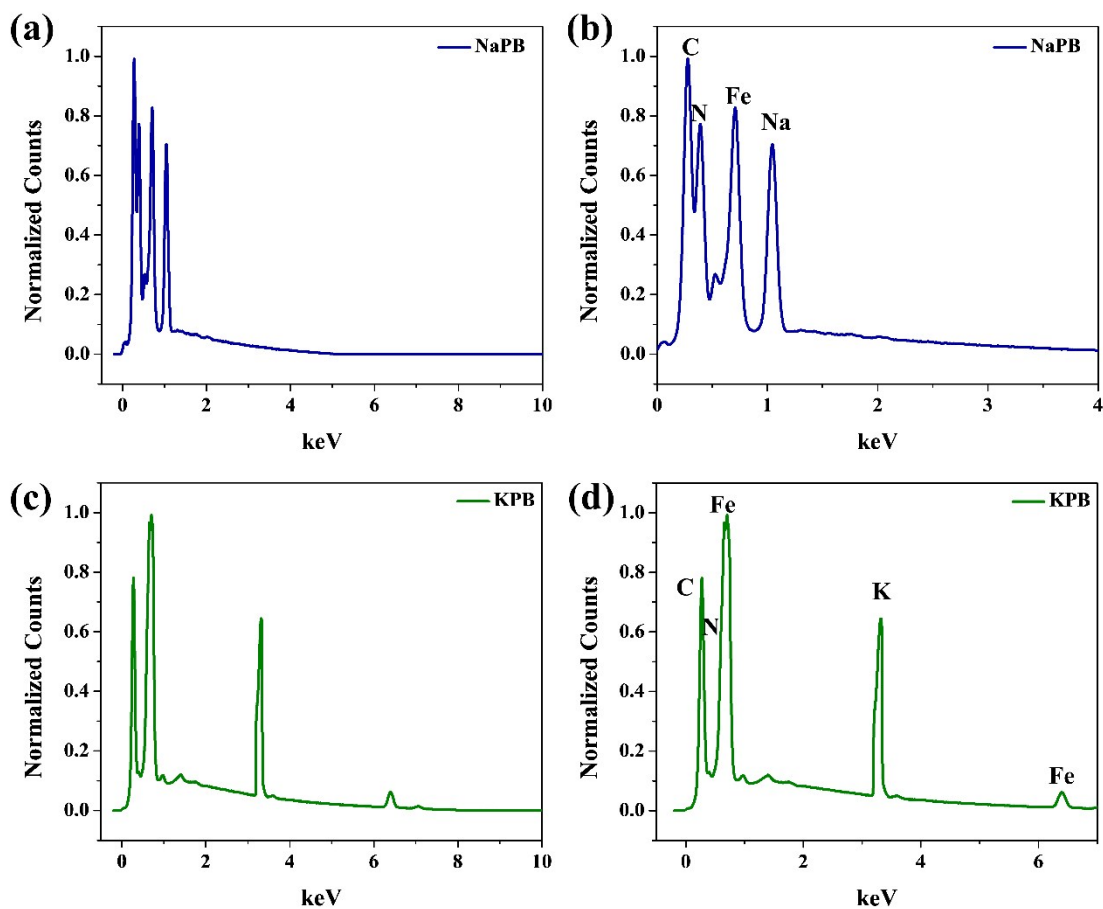

**Figure S8:** Energy dispersive x-ray spectroscopy for elemental analysis of the Prussian blue analogues (a), (b) NaPB and (c), (d) KPB.

**Figure S9**

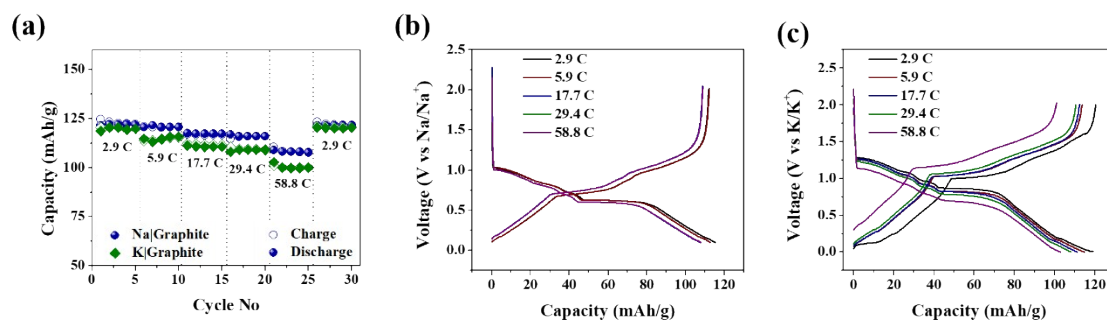

**Figure S9:** Electrochemical data from Na|GR and K|GR half cells (a) rate study, and galvanostatic charge discharge curves of the first cycle at each rate of the rate study for (b) Na|GR, and (c) K|GR.

**Figure S10**

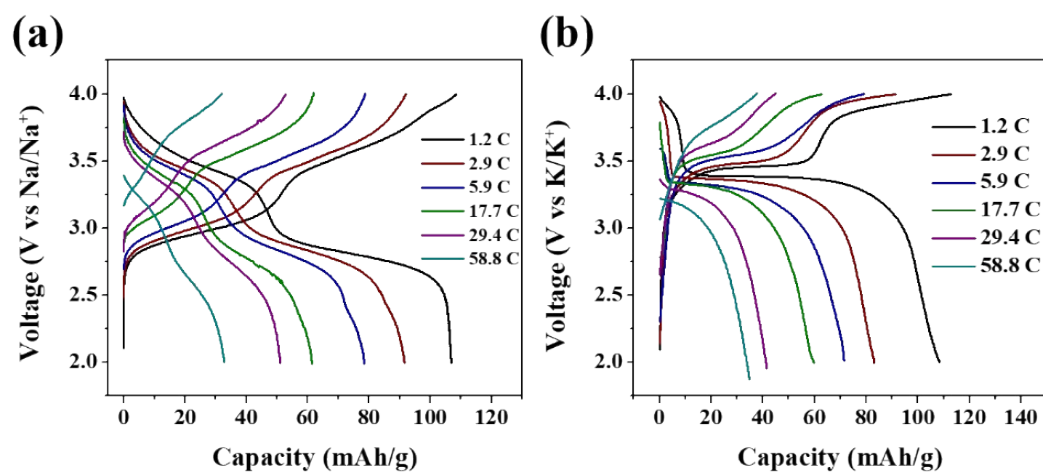

**Figure S10:** Electrochemical data from Na|PB and K|PB half cells, galvanostatic charge discharge curves of the first cycle at each rate of the rate study for (a) Na|PB, and (b) K|PB.

**Figure S11**

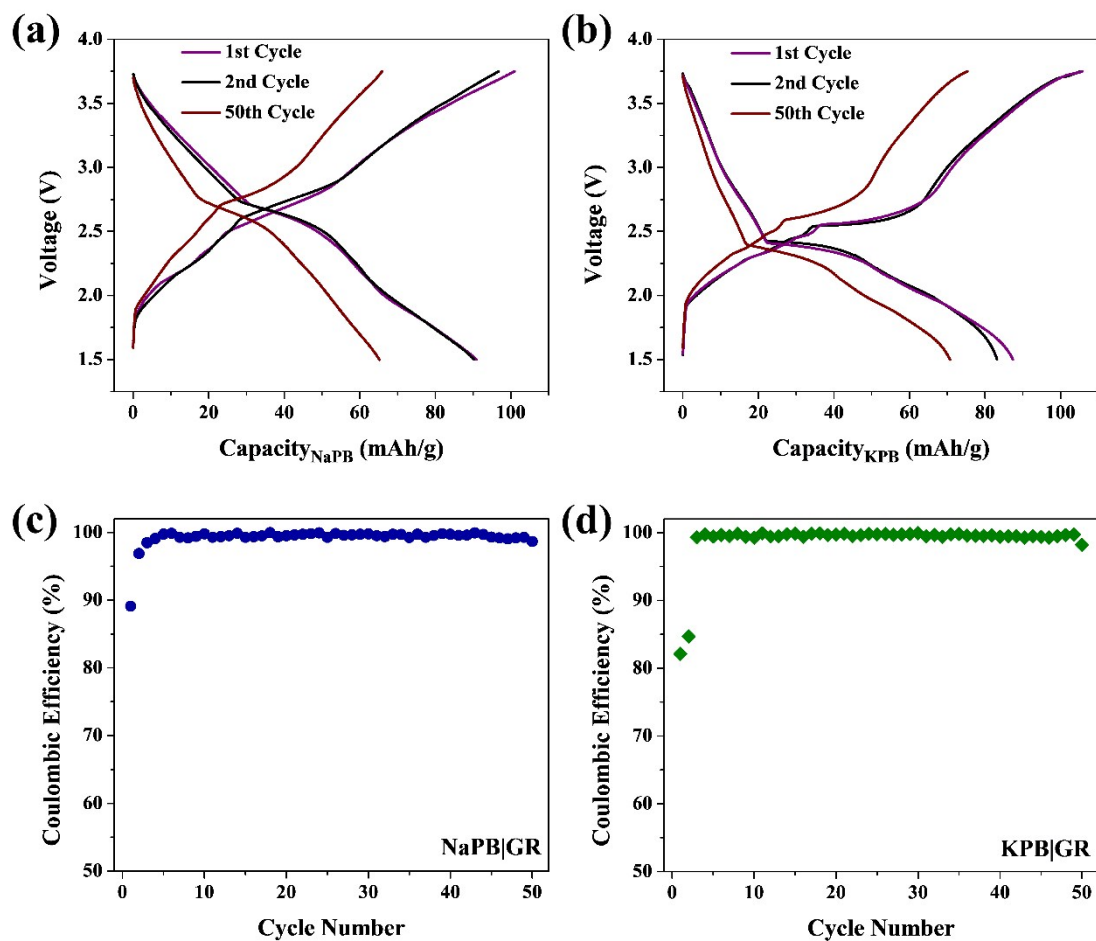

**Figure S11:** Electrochemical data from NaPB|GR and KPB|GR full cells, galvanostatic charge discharge curves of the first, second, and last (50<sup>th</sup>) cycles at 1.2 C for (a) NaPB|GR, and (b) KPB|GR, and corresponding coulombic efficiencies for (c) NaPB|GR, and (d) KPB|GR.

**Figure S12**



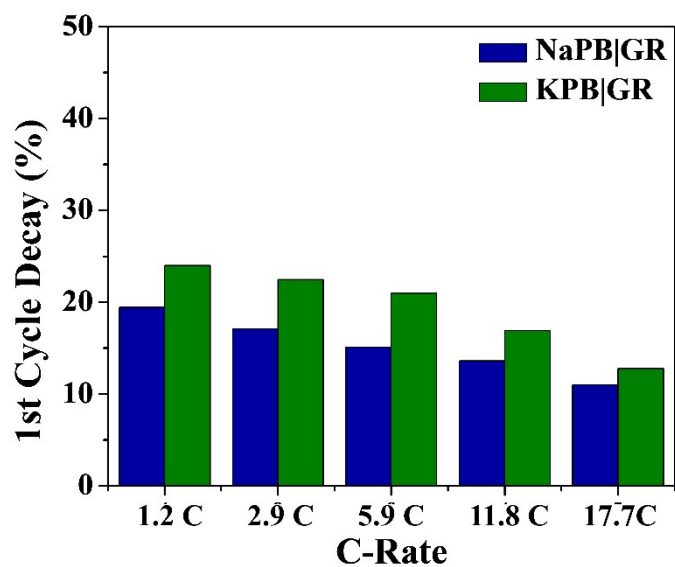

**Figure S12:** 1<sup>st</sup> cycle decay for both NaPB|GR and KPB|GR full cells.

**Figure S13**

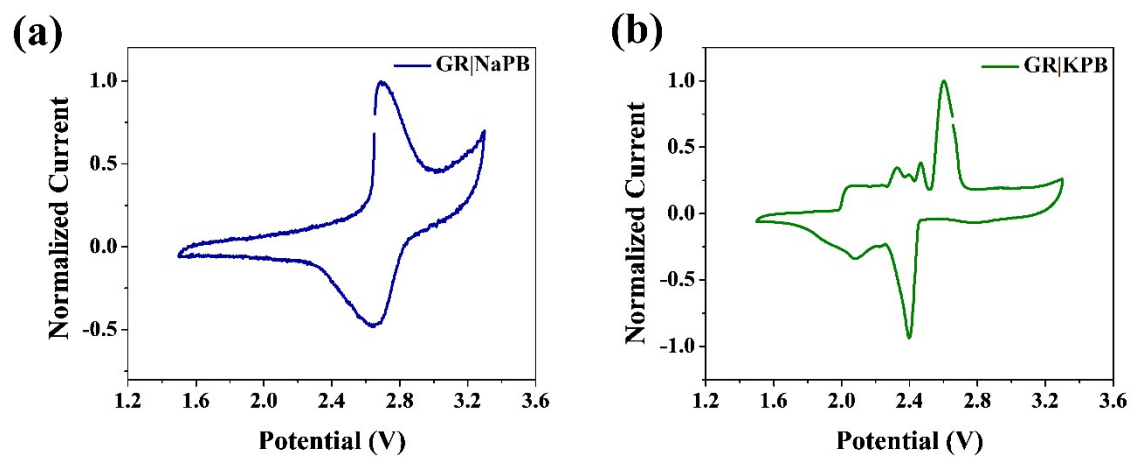

**Figure S13:** Cyclic voltammetry of (a) GR|NaPB and (b) GR|KPB full cells.

**Figure S14**

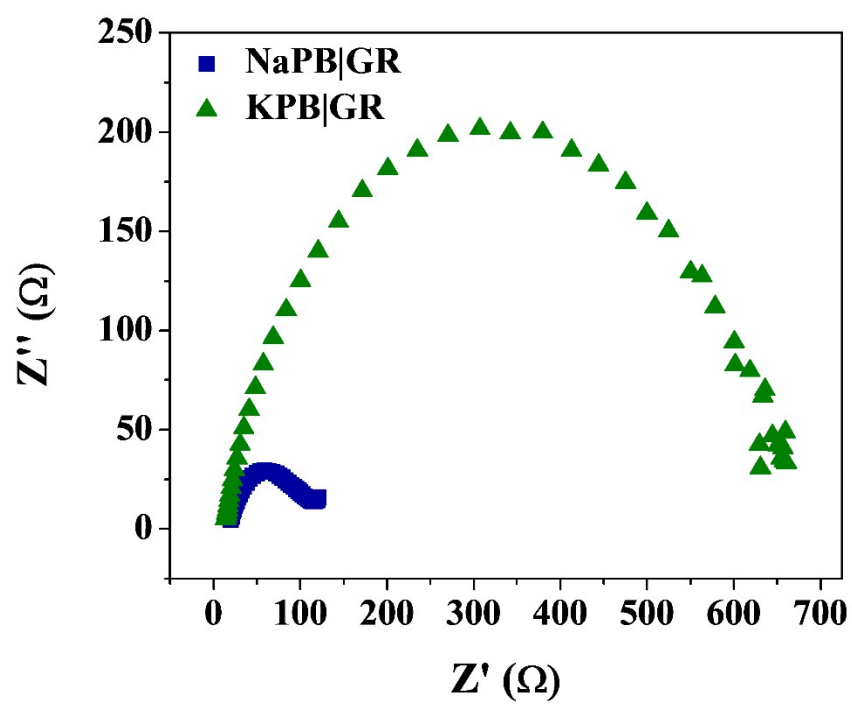

**Figure S14:** EIS data of full cells NaPB|GR and KPB|GR.
